# Supplementary material
Source: MDPI journal article supplement (https://www.mdpi.com/2073-4395/11/11/2115)
Supplement: s1 [file s1]

**Table S1. Mean squares from two-way analysis of variance for observed traits of pistachio.**

| Source of variation   | Organ          | Flower       | Organ × Flower interaction | Residual  |
|-----------------------|----------------|--------------|----------------------------|-----------|
| d.f.                  | 2              | 1            | 2                          | 66        |
| Free radical          | 98.311***      | 4.988        | 4.273                      | 1.864     |
| Mn <sup>2+</sup> ions | 673.495***     | 0.86         | 6.639                      | 8.147     |
| ABA                   | 53545***       | 95           | 1845                       | 2585      |
| SA                    | 13300000000*** | 6980000000** | 1910000000                 | 627000000 |
| IAA                   | 1077.9         | 556.2        | 574.9                      | 427.6     |
| Total sugar content   | 15630.3***     | 1073.6**     | 256.3                      | 142.6     |
| Glucose               | 1315.14***     | 22.27        | 13.69                      | 26.78     |
| Fructose              | 1158.72***     | 95.49        | 54.34                      | 29.46     |
| Sucrose               | 2738.05***     | 172.35**     | 7.29                       | 20.14     |
| Galactose             | 36.992***      | 1.634        | 0.27                       | 2.529     |
| Cu                    | 255.54***      | 15.42        | 107**                      | 17.96     |
| Mg                    | 0.4871***      | 0.03421      | 0.00374                    | 0.03278   |
| Mn                    | 10008.85***    | 1245.42***   | 892.18***                  | 91.06     |
| N                     | 218.171***     | 0.163        | 18.576*                    | 3.988     |
| P                     | 0.085812***    | 0.036026***  | 0.001431                   | 0.001806  |
| Fe                    | 14724.4***     | 151.6        | 1798.7***                  | 229.4     |

\*  $P<0.05$ ; \*\*  $P<0.01$ ; \*\*\*  $P<0.001$

**Table S2. Mean values and standard deviations (s.d.) of 16 observed traits.**

| Flower                | with flower cluster thinning                                   |        | without flower cluster thinning |        |
|-----------------------|----------------------------------------------------------------|--------|---------------------------------|--------|
| Organ                 | Mean                                                           | s.d.   | Mean                            | s.d.   |
| Free radical          |                                                                |        |                                 |        |
| Fruit                 | 1.146                                                          | 0.944  | 1.151                           | 0.581  |
| Leaves                | 5.095                                                          | 2.181  | 5.169                           | 0.702  |
| Shoots                | 3.012                                                          | 1.116  | 4.512                           | 1.86   |
| LSD <sub>0.05</sub>   | Organ: 0.787; Flower: 0.643; Organ × Flower interaction: 1.113 |        |                                 |        |
| Mn <sup>2+</sup> ions |                                                                |        |                                 |        |
| Fruit                 | 6.321                                                          | 1.743  | 5.92                            | 1.152  |
| Leaves                | 15.947                                                         | 4.714  | 14.779                          | 2.811  |
| Shoots                | 5.8                                                            | 1.897  | 6.712                           | 3.286  |
| LSD <sub>0.05</sub>   | Organ: 1.645; Flower: 1.343; Organ × Flower interaction: 2.327 |        |                                 |        |
| ABA                   |                                                                |        |                                 |        |
| Fruit                 | 442.6                                                          | 89.95  | 458.7                           | 63.41  |
| Leaves                | 352.3                                                          | 27.12  | 360.5                           | 18.87  |
| Shoots                | 406.1                                                          | 44.64  | 388.7                           | 17.75  |
| LSD <sub>0.05</sub>   | Organ: 29.31; Flower: 23.93; Organ × Flower interaction: 41.44 |        |                                 |        |
| SA                    |                                                                |        |                                 |        |
| Fruit                 | 30793                                                          | 15395  | 67517                           | 54279  |
| Leaves                | 14713                                                          | 6045   | 35903                           | 22996  |
| Shoots                | 1443                                                           | 1203   | 2605                            | 3127   |
| LSD <sub>0.05</sub>   | Organ: 14428; Flower: 11780; Organ × Flower interaction: 20404 |        |                                 |        |
| IAA                   |                                                                |        |                                 |        |
| Fruit                 | 20.79                                                          | 32.28  | 17.32                           | 19.81  |
| Leaves                | 9.71                                                           | 4.3    | 13.9                            | 11.82  |
| Shoots                | 17.21                                                          | 12.14  | 33.17                           | 28.73  |
| LSD <sub>0.05</sub>   | Organ: 11.92; Flower: 9.73; Organ × Flower interaction: 16.85  |        |                                 |        |
| Total sugar content   |                                                                |        |                                 |        |
| Fruit                 | 62.8                                                           | 24.525 | 47.56                           | 15.188 |
| Leaves                | 13.25                                                          | 3.291  | 8.69                            | 1.495  |
| Shoots                | 12.68                                                          | 3.002  | 9.31                            | 1.206  |
| LSD <sub>0.05</sub>   | Organ: 6.88; Flower: 5.62; Organ × Flower interaction: 9.73    |        |                                 |        |
| Glucose               |                                                                |        |                                 |        |
| Fruit                 | 15.623                                                         | 8.843  | 12.769                          | 9.015  |
| Leaves                | 1.483                                                          | 0.522  | 1.167                           | 0.428  |
| Shoots                | 1.508                                                          | 0.757  | 1.342                           | 0.406  |
| LSD <sub>0.05</sub>   | Organ: 2.983; Flower: 2.435; Organ × Flower interaction: 4.218 |        |                                 |        |
| Fructose              |                                                                |        |                                 |        |
| Fruit                 | 15.801                                                         | 11.436 | 10.043                          | 6.318  |
| Leaves                | 1.283                                                          | 2.161  | 0.387                           | 0.547  |
| Shoots                | 1.067                                                          | 0.826  | 0.812                           | 0.653  |
| LSD <sub>0.05</sub>   | Organ: 3.129; Flower: 2.554; Organ × Flower interaction: 4.424 |        |                                 |        |
| Sucrose               |                                                                |        |                                 |        |
| Fruit                 | 28.66                                                          | 8.804  | 24.3                            | 5.782  |
| Leaves                | 9.33                                                           | 1.312  | 6.75                            | 1.31   |
| Shoots                | 9.09                                                           | 2.28   | 6.74                            | 1.12   |
| LSD <sub>0.05</sub>   | Organ: 2.587; Flower: 2.112; Organ × Flower interaction: 3.658 |        |                                 |        |

|                     |                                                                 |         |        |         |
|---------------------|-----------------------------------------------------------------|---------|--------|---------|
|                     | Galactose                                                       |         |        |         |
| Fruit               | 2.687                                                           | 2.903   | 2.345  | 2.554   |
| Leaves              | 0.594                                                           | 0.44    | 0.103  | 0.114   |
| Shoots              | 0.419                                                           | 0.089   | 0.347  | 0.078   |
| LSD <sub>0.05</sub> | Organ: 0.917; Flower: 0.748; Organ × Flower interaction: 1.296  |         |        |         |
|                     | Cu                                                              |         |        |         |
| Fruit               | 4.171                                                           | 3.943   | 1.579  | 1.944   |
| Leaves              | 11.126                                                          | 4.964   | 7.065  | 3.568   |
| Shoots              | 2.338                                                           | 1.964   | 6.214  | 6.872   |
| LSD <sub>0.05</sub> | Organ: 2.443; Flower: 1.995; Organ × Flower interaction: 3.455  |         |        |         |
|                     | Mg                                                              |         |        |         |
| Fruit               | 0.0659                                                          | 0.0295  | 0.0857 | 0.0397  |
| Leaves              | 0.3161                                                          | 0.2721  | 0.3857 | 0.2953  |
| Shoots              | 0.1284                                                          | 0.0936  | 0.1699 | 0.1555  |
| LSD <sub>0.05</sub> | Organ: 0.104; Flower: 0.085; Organ × Flower interaction: 0.1476 |         |        |         |
|                     | Mn                                                              |         |        |         |
| Fruit               | 7.1                                                             | 4.528   | 3.28   | 3.119   |
| Leaves              | 41.5                                                            | 7.002   | 49.71  | 6.797   |
| Shoots              | 9.98                                                            | 7.983   | 30.54  | 18.899  |
| LSD <sub>0.05</sub> | Organ: 5.5; Flower: 4.49; Organ × Flower interaction: 7.78      |         |        |         |
|                     | N                                                               |         |        |         |
| Fruit               | 6.895                                                           | 1.624   | 8.832  | 2.608   |
| Leaves              | 3.517                                                           | 1.59    | 2.415  | 1.239   |
| Shoots              | 2.928                                                           | 2.344   | 1.808  | 2.221   |
| LSD <sub>0.05</sub> | Organ: 1.151; Flower: 0.94; Organ × Flower interaction: 1.628   |         |        |         |
|                     | P                                                               |         |        |         |
| Fruit               | 0.2285                                                          | 0.0398  | 0.1664 | 0.04985 |
| Leaves              | 0.1105                                                          | 0.03981 | 0.0781 | 0.03528 |
| Shoots              | 0.1133                                                          | 0.05908 | 0.0736 | 0.02107 |
| LSD <sub>0.05</sub> | Organ: 0.024; Flower: 0.02; Organ × Flower interaction: 0.035   |         |        |         |
|                     | Fe                                                              |         |        |         |
| Fruit               | 43.27                                                           | 5.38    | 25.43  | 5.96    |
| Leaves              | 85.62                                                           | 17.68   | 78.68  | 16.36   |
| Shoots              | 38.95                                                           | 21.44   | 55.03  | 16.5    |
| LSD <sub>0.05</sub> | Organ: 8.73; Flower: 7.13; Organ × Flower interaction: 12.35    |         |        |         |

**Table S3. Correlation coefficients between all pairs of observed traits.**

| Trait                 | Free radical | Mn <sup>2+</sup> ions | ABA      | SA      | IAA        | Total sugar content | Glucose  | Fructose | Sucrose  | Galactose | Cu      | Mg       | Mn       | N       | P       |
|-----------------------|--------------|-----------------------|----------|---------|------------|---------------------|----------|----------|----------|-----------|---------|----------|----------|---------|---------|
| Mn <sup>2+</sup> ions | 0.71***      |                       |          |         |            |                     |          |          |          |           |         |          |          |         |         |
| ABA                   | -0.45***     | -0.34**               |          |         |            |                     |          |          |          |           |         |          |          |         |         |
| SA                    | -0.27        | -0.05                 | 0.24*    |         |            |                     |          |          |          |           |         |          |          |         |         |
| IAA                   | 0.1          | -0.19                 | 0.21     | 0.02    |            |                     |          |          |          |           |         |          |          |         |         |
| Total sugar content   | -0.68***     | -0.35**               | 0.69***  | 0.24*   | 0.1        |                     |          |          |          |           |         |          |          |         |         |
| Glucose               | -0.6***      | -0.3*                 | 0.72***  | 0.19    | 0.08       | 0.93***             |          |          |          |           |         |          |          |         |         |
| Fructose              | -0.54***     | -0.3*                 | 0.67***  | 0.12    | 0.06       | 0.86***             | 0.84***  |          |          |           |         |          |          |         |         |
| Sucrose               | -0.72***     | -0.38***              | 0.51***  | 0.42*** | 0.09       | 0.9***              | 0.73***  | 0.63***  |          |           |         |          |          |         |         |
| Galactose             | -0.49***     | -0.19                 | 0.59***  | 0.26*   | 0.25*      | 0.76***             | 0.71***  | 0.4***   | 0.75***  |           |         |          |          |         |         |
| Cu                    | 0.59***      | 0.59***               | -0.44*** | -0.16   | 0.03       | -0.32**             | -0.31**  | -0.2     | -0.33**  | -0.27*    |         |          |          |         |         |
| Mg                    | 0.36**       | 0.45***               | -0.31**  | -0.05   | -0.14      | -0.33**             | -0.3*    | -0.27*   | -0.35**  | -0.23     | 0.27*   |          |          |         |         |
| Mn                    | 0.79***      | 0.78***               | -0.48*** | -0.19   | -0.01      | -0.58***            | -0.5***  | -0.47*** | -0.63*** | -0.39***  | 0.61*** | 0.52***  |          |         |         |
| N                     | -0.6***      | -0.35**               | 0.39***  | 0.39*** | -0.14      | 0.59***             | 0.51***  | 0.56***  | 0.62***  | 0.26*     | -0.3*   | -0.28*   | -0.58*** |         |         |
| P                     | -0.71***     | -0.37**               | 0.33**   | 0.19    | -0.11      | 0.76***             | 0.62***  | 0.6***   | 0.82***  | 0.53***   | -0.31** | -0.39*** | -0.64*** | 0.52*** |         |
| Fe                    | 0.56***      | 0.63***               | -0.52*** | -0.15   | -<br>0.21* | -0.43***            | -0.42*** | -0.33**  | -0.44*** | -0.33**   | 0.49*** | 0.45***  | 0.68***  | -0.37** | -0.37** |

\*  $P<0.05$ ; \*\*  $P<0.01$ ; \*\*\*  $P<0.001$
